# Supplementary material for: Oceanic efflux of ancient marine dissolved organic carbon in primary marine aerosol
Source: PubMed Central journal article supplement — Sci Adv. 2019 Oct 23;5(10):eaax6535. doi: 10.1126/sciadv.aax6535 (PMC6810255; doi:10.1126/sciadv.aax6535), 2019-10-23
Supplement: aax6535_SM.pdf [file aax6535_SM.pdf]

## Supplementary Materials for

### **Oceanic efflux of ancient marine dissolved organic carbon in primary marine aerosol**

Steven R. Beaupré\*, David J. Kieber, William C. Keene, Michael S. Long, John R. Maben, Xi Lu, Yuting Zhu,  
Amanda A. Frossard, Joanna D. Kinsey, Patrick Duplessis, Rachel Y.-W. Chang, John Bisgrove

\*Corresponding author. Email: [steven.beaupre@stonybrook.edu](mailto:steven.beaupre@stonybrook.edu)

Published 23 October 2019, *Sci. Adv.* **5**, eaax6535 (2019)  
DOI: 10.1126/sciadv.aax6535

#### **This PDF file includes:**

- Table S1. Blank-corrected mPMA sample masses and  $^{14}\text{C}$  abundances.
- Table S2. Globally averaged rates of RDOC transfer from the ocean to the atmosphere via PMA formation.
- Table S3. Published sources and losses of marine RDOC.
- Table S4. mPMA handling blank masses and  $^{14}\text{C}$  abundances.
- Table S5. Uncorrected mPMA sample masses and  $^{14}\text{C}$  abundances.
- Table S6. Seawater DOC concentrations,  $\delta^{13}\text{C}$  values, and  $^{14}\text{C}$  abundances.
- Table S7. Seawater DIC concentrations,  $\delta^{13}\text{C}$  values, and  $^{14}\text{C}$  abundances.

## Supplementary Materials for

**Table S1. Blank-corrected mPMA sample masses and  $^{14}\text{C}$  abundances.** Values reported as Fraction modern (Fm),  $\Delta^{14}\text{C}$ , and  $^{14}\text{C}$  age. Measurement uncertainties ( $\pm 1$  standard deviation) were propagated from the uncorrected mPMA samples (Table S3) and the means and standard errors of the sample handling blank (Table S3). Each sample is reported with the date on which it was collected. All seawater was drawn from 5 m to generate mPMA.

| Laboratory ID<br>(UCI AMS #)                                | Date     | Mass *<br>( $\mu\text{g C}$ ) | Fm                | $\Delta^{14}\text{C}$<br>(‰) | Age<br>( $^{14}\text{C}$ yr) |
|-------------------------------------------------------------|----------|-------------------------------|-------------------|------------------------------|------------------------------|
| <i>GB, Georges Bank</i>                                     |          |                               |                   |                              |                              |
| 199542 †                                                    | 9/18/16  | 15.7 $\pm$ 0.8                | 0.867 $\pm$ 0.023 | -140 $\pm$ 23                | 1150 $\pm$ 220               |
| 199543 ‡                                                    | 9/19/16  | 6.7 $\pm$ 0.8                 | 0.829 $\pm$ 0.056 | -177 $\pm$ 56                | 1500 $\pm$ 550               |
| 192361                                                      | 9/20/16  | 7.1 $\pm$ 0.8                 | 0.819 $\pm$ 0.047 | -188 $\pm$ 47                | 1610 $\pm$ 470               |
| <i>SSW, Sargasso West</i>                                   |          |                               |                   |                              |                              |
| 199546                                                      | 9/24/16  | 18.4 $\pm$ 0.8                | 0.841 $\pm$ 0.020 | -166 $\pm$ 20                | 1390 $\pm$ 190               |
| <i>SSN, Sargasso North</i>                                  |          |                               |                   |                              |                              |
| 192368                                                      | 10/6/16  | 5.1 $\pm$ 0.8                 | 0.858 $\pm$ 0.069 | -149 $\pm$ 69                | 1230 $\pm$ 650               |
| <i>BI, Coastal Rhode Island</i>                             |          |                               |                   |                              |                              |
| 192369                                                      | 10/10/16 | 37.1 $\pm$ 0.8                | 0.957 $\pm$ 0.011 | -50 $\pm$ 11                 | 350 $\pm$ 90                 |
| 192370                                                      | 10/11/16 | 14.1 $\pm$ 0.8                | 1.002 $\pm$ 0.029 | -6 $\pm$ 29                  | Modern                       |
| <i>Near-surface Averages excluding observations from BI</i> |          |                               |                   |                              |                              |
| Mean (n = 5)                                                |          | 10.6                          | 0.843             | -164                         | 1370                         |
| Standard deviation of measurements                          |          | $\pm$ 6.0                     | $\pm$ 0.020       | $\pm$ 20                     | $\pm$ 190                    |
| Propagated standard deviation of the mean                   |          | $\pm$ 0.4                     | $\pm$ 0.021       | $\pm$ 21                     | $\pm$ 210                    |

\* Mass of organic carbon collected on the central disc (38 mm diameter) of each filter

† mPMA generated during daytime (between sunrise and sunset)

‡ mPMA generated during nighttime (between sunset and sunrise)

**Table S2. Globally averaged rates of RDOC transfer from the ocean to the atmosphere via PMA formation.** Transfer rates were based on published PMA OM production rates and the  $^{14}\text{C}$ -based fractions of RDOC in mPMA generated from near surface waters (5 m) assuming that RDOC is entirely fossil carbon ( $\Delta^{14}\text{C} = -1000 \text{ ‰}$ ,  $X_{\text{RDOC/PMA}} = 19 \%$ ) or identical to bulk DOC from deep seawater (depth = 2500 m, mean  $\Delta^{14}\text{C} = -457 \pm 8 \text{ ‰}$  ( $n = 3$ ),  $X_{\text{RDOC/PMA}} = 40 \%$ ).

| Global PMA OM production rates<br>(Tg C yr <sup>-1</sup> ) | Production rate references | PMA RDOC production rates (Tg C yr <sup>-1</sup> ) |                      |
|------------------------------------------------------------|----------------------------|----------------------------------------------------|----------------------|
|                                                            |                            | 19 % RDOC (Fossil)                                 | 40 % RDOC (Deep sea) |
| 50                                                         | Roelofs et al. (23)        | 10                                                 | 20                   |
| 35                                                         | Roelofs et al. (23)        | 7                                                  | 14                   |
| 29                                                         | Long et al. (22)           | 6                                                  | 11                   |
| 22.3                                                       | Gantt et al. (21)          | 4                                                  | 9                    |
| 8                                                          | Spracklen et al. (24)      | 2                                                  | 3                    |

**Table S3. Published sources and losses of marine RDOC.** Values converted into consistent units of Teragrams (Tg) and years (yr), given that 1 mol C = 12.011 g C and 1 Pg = 10<sup>3</sup> Tg = 10<sup>15</sup> g.

| Process                     | Global Rate<br>(Tg C yr <sup>-1</sup> ) | Turnover time<br>(yr) | % of total<br>Sources or Losses * |
|-----------------------------|-----------------------------------------|-----------------------|-----------------------------------|
| <b>All Sources</b> †        | <b>43</b>                               | <b>16,000</b>         | <b>100</b>                        |
| <b>All Losses</b> ‡         | <b>326 to 1394</b>                      | <b>450 to 1,900</b>   | <b>100</b>                        |
| Photochemical Degradation § | 300 to 1300                             | 500 to 2,300          | 76 to 98                          |
| Incorporation into POC      | 25 to 50                                | 13,000 to 25,000      | 1.8 to 14                         |
| Biological Degradation ¶    | ≤ 43                                    | ≥ 15,000              | ≤ 12                              |
| Hydrothermal Circulation #  | 1 to 1.4                                | 440,000 to 700,000    | 0.07 to 0.44                      |

**Difference = All Sources – All Losses = -283 to -1351**

\* Minimum percentages assume the process proceeds at the minimum reported global rate while all other processes proceed at their maximum reported rates; maximum percentages assume the process proceeds at the maximum reported global rate while all other processes proceed at their minimum reported rates.

† Global rate (0.043 Pg C yr<sup>-1</sup>) and turnover time (16,000 yr) from Hansell (2).

‡ Turnover time (with respect to All Losses) = global mass / All Losses, assuming a 630 Pg C global mass of RDOC (2).

§ Range of turnover times (500 yr to 2300 yr) from Mopper et al. (9) and Anderson and Williams (25).  
Global rates = turnover times / global mass, assuming a 630 Pg C global mass of RDOC (2).

|| Global rates (0.025 to 0.05 Pg C yr<sup>-1</sup>) from Hansell et al. (8) and Druffel and Williams (10).  
Turnover times = global mass / global rates, assuming a 630 Pg C global mass of RDOC (2).

¶ Upper limit (0.043 Pg C) from Hansell (2) based on global correlations between DOC concentrations and DIC Δ<sup>14</sup>C values and the assumption of a primarily biological sink.

# Total global rates are reported as losses during transit through cooler off-axis systems (0.8 to 1.2×10<sup>11</sup> mol DOC yr<sup>-1</sup>) (13), which exceed reported losses through high temperature systems by one to three orders of magnitude (7×10<sup>9</sup> to 1.3×10<sup>11</sup> g C yr<sup>-1</sup>) (11, 12). Turnover times = global mass / global rate, assuming a 630 Pg C global mass of RDOC (2).

**Table S4. mPMA handling blank masses and  $^{14}\text{C}$  abundances.** Values reported with individual measurement uncertainties ( $\pm 1$  standard deviation), and associated Z-Scores. Each blank is reported with the date on which it was collected.

| Laboratory ID<br>(UCI AMS #)                        | Date     | Mass*<br>( $\mu\text{g C}$ ) | Fm                | $\Delta^{14}\text{C}$<br>( $\text{‰}$ ) | Age<br>( $^{14}\text{C}$ yr) | Z-Score <sup>†</sup><br>(mass) | Z-Score <sup>†</sup><br>(Fm) |
|-----------------------------------------------------|----------|------------------------------|-------------------|-----------------------------------------|------------------------------|--------------------------------|------------------------------|
| <i><b>GB, Georges Bank</b></i>                      |          |                              |                   |                                         |                              |                                |                              |
| 199541                                              | 9/18/16  | $5.4 \pm 0.6$                | $0.332 \pm 0.059$ | $-671 \pm 59$                           | $8860 \pm 1420$              | -0.31                          | -1.44                        |
| 187986                                              | 9/22/16  | $4.0 \pm 0.6$                | $0.559 \pm 0.024$ | $-445 \pm 24$                           | $4670 \pm 350$               | -0.32                          | 0.79                         |
| <i><b>SSW, Sargasso West</b></i>                    |          |                              |                   |                                         |                              |                                |                              |
| 199545                                              | 9/24/16  | $5.4 \pm 0.6$                | $0.328 \pm 0.059$ | $-674 \pm 59$                           | $8940 \pm 1440$              | -0.31                          | -1.48                        |
| 192363                                              | 9/26/16  | $9.0 \pm 0.6$                | $0.559 \pm 0.024$ | $-445 \pm 24$                           | $4670 \pm 350$               | -0.29                          | 0.79                         |
| <i><b>SSN, Sargasso North</b></i>                   |          |                              |                   |                                         |                              |                                |                              |
| 192366 <sup>‡</sup>                                 | 10/2/16  | $504 \pm 1.0$                | $0.530 \pm 0.007$ | $-474 \pm 7$                            | $5100 \pm 110$               | 2.85                           | 0.50                         |
| 192401                                              | 10/3/16  | $4.0 \pm 0.6$                | $0.459 \pm 0.041$ | $-545 \pm 41$                           | $6260 \pm 730$               | -0.32                          | -0.19                        |
| 192367                                              | 10/5/16  | $6.0 \pm 0.6$                | $0.524 \pm 0.027$ | $-480 \pm 27$                           | $5190 \pm 420$               | -0.31                          | 0.44                         |
| <i><b>BI, Coastal Rhode Island</b></i>              |          |                              |                   |                                         |                              |                                |                              |
| 192374                                              | 10/12/16 | $4.0 \pm 0.6$                | $0.469 \pm 0.042$ | $-535 \pm 42$                           | $6090 \pm 720$               | -0.32                          | -0.10                        |
| 192371                                              | 10/13/16 | $4.0 \pm 0.6$                | $0.394 \pm 0.044$ | $-609 \pm 44$                           | $7470 \pm 900$               | -0.32                          | -0.83                        |
| 192372                                              | 10/13/16 | $2.0 \pm 0.6$                | $0.633 \pm 0.103$ | $-372 \pm 103$                          | $3670 \pm 1320$              | -0.33                          | 1.52                         |
| <i><b>Summary, excluding UCID 192366</b></i>        |          |                              |                   |                                         |                              |                                |                              |
| Mean, excluding UCID#192366 (n = 9)                 |          | 4.9                          | 0.47              | -531                                    | 6202                         |                                |                              |
| Standard deviation of measurements                  |          | $\pm 1.9$                    | $\pm 0.11$        | $\pm 105$                               | $\pm 1881$                   |                                |                              |
| Propagated standard deviation of the mean           |          | $\pm 0.2$                    | $\pm 0.02$        | $\pm 17$                                | $\pm 317$                    |                                |                              |
| Standard error of the mean                          |          | $\pm 0.6$                    | $\pm 0.04$        | $\pm 35$                                | $\pm 627$                    |                                |                              |
| Uncertainty-weighted error of the mean <sup>§</sup> |          | $\pm 0.2$                    | $\pm 0.01$        | $\pm 12$                                | $\pm 187$                    |                                |                              |

\* Mass of organic carbon collected on the central disc (38 mm diameter) of each filter

† Z-score = (value – mean)/standard deviation, for all measurements of mass or Fm (n = 10)

‡ By Chauvenet's Criterion, the Z-score for UCID 192366's mass exceeded a two-tailed critical value of  $1.96 = 1 - 1/4n$  for normally distributed data (n = 10), and therefore was excluded from further analyses.

§ Single standard deviation when observations are weighted by their inverse variances, such that  $\sigma = (1/\sum(1/\sigma_i^2))^{1/2}$

**Table S5. Uncorrected mPMA sample masses and  $^{14}\text{C}$  abundances.** Values reported with individual measurement uncertainties ( $\pm 1$  standard deviation). Each sample is reported with the date on which it was collected.

| Laboratory ID<br>(UCI AMS #)    | Date     | Depth<br>(m) | Mass*<br>( $\mu\text{g C}$ ) | Fm                  | $\Delta^{14}\text{C}$<br>(‰) | Age<br>( $^{14}\text{C}$ yr) |
|---------------------------------|----------|--------------|------------------------------|---------------------|------------------------------|------------------------------|
| <i>GB, Georges Bank</i>         |          |              |                              |                     |                              |                              |
| 199542 †                        | 9/18/16  | 5            | 20.6 $\pm$ 0.6               | 0.7723 $\pm$ 0.0087 | -234.0 $\pm$ 8.7             | 2080 $\pm$ 100               |
| 199543 ‡                        | 9/19/16  | 5            | 11.6 $\pm$ 0.6               | 0.6774 $\pm$ 0.0189 | -328.1 $\pm$ 18.9            | 3130 $\pm$ 230               |
| 192361                          | 9/20/16  | 5            | 12.0 $\pm$ 0.6               | 0.6763 $\pm$ 0.0123 | -329.2 $\pm$ 12.3            | 3140 $\pm$ 150               |
| <i>SSW, Sargasso West</i>       |          |              |                              |                     |                              |                              |
| 199546                          | 9/24/16  | 5            | 23.3 $\pm$ 0.6               | 0.7630 $\pm$ 0.0086 | -243.3 $\pm$ 8.6             | 2170 $\pm$ 100               |
| <i>SSN, Sargasso North</i>      |          |              |                              |                     |                              |                              |
| 192368                          | 10/6/16  | 5            | 10.0 $\pm$ 0.6               | 0.6680 $\pm$ 0.0139 | -337.4 $\pm$ 13.9            | 3240 $\pm$ 170               |
| 192365 §                        | 10/1/16  | 5            | 15.0 $\pm$ 0.6               | 0.8251 $\pm$ 0.0117 | -181.6 $\pm$ 11.7            | 1540 $\pm$ 120               |
| <i>GB, Coastal Rhode Island</i> |          |              |                              |                     |                              |                              |
| 192369                          | 10/10/16 | 5            | 42.0 $\pm$ 0.6               | 0.9006 $\pm$ 0.0044 | -106.7 $\pm$ 4.4             | 840 $\pm$ 40                 |
| 192370                          | 10/11/16 | 5            | 19.0 $\pm$ 0.6               | 0.8647 $\pm$ 0.0077 | -142.3 $\pm$ 7.7             | 1170 $\pm$ 80                |

\* Blank-corrected mass of organic carbon collected on the central disc (38 mm diameter) of each filter

† mPMA generated during daytime (between sunrise and sunset)

‡ mPMA generated during nighttime (between sunset and sunrise)

§ Filter visibly contaminated with dark brown residues after loading into the combustion tubes, and therefore excluded from further analyses

**Table S6. Seawater DOC concentrations,  $\delta^{13}\text{C}$  values, and  $^{14}\text{C}$  abundances.** Values reported with individual measurement uncertainties ( $\pm 1$  standard deviation). Each sample is reported with the date on which it was collected.

| Laboratory ID<br>(UCI AMS #)              | Date     | Depth<br>(m) | [DOC]<br>( $\mu\text{M}$ ) | $\delta^{13}\text{C}$<br>(‰) | Fm                  | $\Delta^{14}\text{C}$<br>(‰) | Age<br>( $^{14}\text{C}$ yr) |
|-------------------------------------------|----------|--------------|----------------------------|------------------------------|---------------------|------------------------------|------------------------------|
| <i>GB, Georges Bank</i>                   |          |              |                            |                              |                     |                              |                              |
| 192390                                    | 9/18/16  | 5            | 93 $\pm$ 1                 | -21.0 $\pm$ 0.2              | 0.7480 $\pm$ 0.0014 | -258.0 $\pm$ 1.4             | 2330 $\pm$ 15                |
| 192378                                    | 9/19/16  | 5            | 86 $\pm$ 1                 | -21.4 $\pm$ 0.2              | 0.7676 $\pm$ 0.0012 | -238.6 $\pm$ 1.2             | 2125 $\pm$ 15                |
| <i>SSW, Sargasso West</i>                 |          |              |                            |                              |                     |                              |                              |
| 192384                                    | 9/25/16  | 5            | 74 $\pm$ 1                 | -21.1 $\pm$ 0.2              | 0.7147 $\pm$ 0.0011 | -291.0 $\pm$ 1.1             | 2700 $\pm$ 15                |
| 192381                                    | 9/24/16  | 2000         | 40 $\pm$ 1                 | -20.8 $\pm$ 0.2              | 0.5700 $\pm$ 0.0010 | -434.6 $\pm$ 1.0             | 4515 $\pm$ 15                |
| 192386                                    | 9/25/16  | 2500         | 44 $\pm$ 1                 | -21.9 $\pm$ 0.2              | 0.5442 $\pm$ 0.0010 | -460.2 $\pm$ 1.0             | 4890 $\pm$ 15                |
| <i>SSN, Sargasso North</i>                |          |              |                            |                              |                     |                              |                              |
| 192387                                    | 10/2/16  | 5            | 73 $\pm$ 1                 | -20.5 $\pm$ 0.2              | 0.7651 $\pm$ 0.0012 | -241.1 $\pm$ 1.2             | 2150 $\pm$ 15                |
| 192392 *                                  | 10/6/16  | 5            | 69 $\pm$ 1                 | -21.0 $\pm$ 0.2              | 0.7713 $\pm$ 0.0012 | -234.9 $\pm$ 1.2             | 2085 $\pm$ 15                |
| 192393 †                                  | 10/6/16  | 5            | 71 $\pm$ 1                 | -20.8 $\pm$ 0.2              | 0.7786 $\pm$ 0.0013 | -227.7 $\pm$ 1.3             | 2010 $\pm$ 15                |
| 192379                                    | 10/1/16  | 2500         | 47 $\pm$ 1                 | -21.8 $\pm$ 0.2              | 0.5411 $\pm$ 0.0010 | -463.2 $\pm$ 1.0             | 4935 $\pm$ 15                |
| 192388                                    | 10/1/16  | 2500         | 47 $\pm$ 1                 | -21.8 $\pm$ 0.2              | 0.5565 $\pm$ 0.0010 | -448.0 $\pm$ 1.0             | 4710 $\pm$ 15                |
| <i>BI, Coastal Rhode Island</i>           |          |              |                            |                              |                     |                              |                              |
| 192380                                    | 10/10/16 | 5            | 92 $\pm$ 1                 | -21.3 $\pm$ 0.2              | 0.7821 $\pm$ 0.0012 | -224.2 $\pm$ 1.2             | 1975 $\pm$ 15                |
| 192391                                    | 10/10/16 | 5            | 91 $\pm$ 1                 | -21.4 $\pm$ 0.2              | 0.7762 $\pm$ 0.0012 | -230.1 $\pm$ 1.2             | 2035 $\pm$ 15                |
| <i>Deep ocean (2500 m) averages</i>       |          |              |                            |                              |                     |                              |                              |
| Mean (n = 3)                              |          |              | 46                         | -21.8                        | 0.547               | -457                         | 4840                         |
| Standard deviation of measurements        |          |              | $\pm 2$                    | $\pm 0.1$                    | $\pm 0.008$         | $\pm 8$                      | $\pm 120$                    |
| Propagated standard deviation of the mean |          |              | $\pm 1$                    | $\pm 0.1$                    | $\pm 0.001$         | $\pm 1$                      | $\pm 15$                     |

\* Seawater from *Endeavor's* clean pumping system that was sampled immediately upstream of the aerosol generator's inlet

† Seawater sampled from the aerosol generator's outlet

**Table S7. Seawater DIC concentrations,  $\delta^{13}\text{C}$  values, and  $^{14}\text{C}$  abundances.** Values reported with individual measurement uncertainties ( $\pm 1$  standard deviation). Each sample is reported with the date on which it was collected.

| Laboratory ID<br>(UCI AMS #)    | Date     | Depth<br>(m) | [DIC]<br>( $\mu\text{M}$ ) | $\delta^{13}\text{C}$<br>(‰) | Fm                  | $\Delta^{14}\text{C}$<br>(‰) | Age<br>( $^{14}\text{C}$ yr) |
|---------------------------------|----------|--------------|----------------------------|------------------------------|---------------------|------------------------------|------------------------------|
| <i>GB, Georges Bank</i>         |          |              |                            |                              |                     |                              |                              |
| 187983                          | 9/19/16  | 5            | 2245 $\pm$ 24              | 1.2 $\pm$ 0.1                | 1.0269 $\pm$ 0.0016 | 18.7 $\pm$ 1.6               | > Modern                     |
| 187984                          | 9/19/16  | 5            | 2154 $\pm$ 24              | 1.2 $\pm$ 0.1                | 1.0278 $\pm$ 0.0017 | 19.6 $\pm$ 1.7               | > Modern                     |
| <i>SSW, Sargasso West</i>       |          |              |                            |                              |                     |                              |                              |
| 187982                          | 9/25/16  | 5            | 2122 $\pm$ 24              | 0.8 $\pm$ 0.1                | 1.0531 $\pm$ 0.0018 | 44.7 $\pm$ 1.8               | > Modern                     |
| 187981                          | 9/25/16  | 2500         | 2263 $\pm$ 24              | 1.1 $\pm$ 0.1                | 0.9511 $\pm$ 0.0013 | -56.4 $\pm$ 1.3              | 400 $\pm$ 15                 |
| <i>SSN, Sargasso North</i>      |          |              |                            |                              |                     |                              |                              |
| 187987                          | 10/2/16  | 5            | 2069 $\pm$ 24              | 1.0 $\pm$ 0.1                | 1.0496 $\pm$ 0.0015 | 41.3 $\pm$ 1.5               | > Modern                     |
| 187985                          | 10/1/16  | 2500         | 2276 $\pm$ 24              | 1.0 $\pm$ 0.1                | 0.9684 $\pm$ 0.0014 | -39.3 $\pm$ 1.4              | 260 $\pm$ 15                 |
| 187986                          | 10/1/16  | 2500         | 2134 $\pm$ 24              | 0.9 $\pm$ 0.1                | 0.9675 $\pm$ 0.0014 | -40.2 $\pm$ 1.4              | 265 $\pm$ 15                 |
| <i>BI, Coastal Rhode Island</i> |          |              |                            |                              |                     |                              |                              |
| 187988                          | 10/10/16 | 5            | 2138 $\pm$ 24              | 0.8 $\pm$ 0.1                | 1.0333 $\pm$ 0.0015 | 25.1 $\pm$ 1.5               | > Modern                     |
| 187990                          | 10/10/16 | 5            | 2139 $\pm$ 24              | 0.8 $\pm$ 0.1                | 1.0293 $\pm$ 0.0015 | 21.1 $\pm$ 1.5               | > Modern                     |
